# EUROPEAN JOURNAL OF PUBLIC HEALTH

Volume 18 Supplement 1

## SUPPLEMENT

### 16TH EUPHA CONFERENCE

I-health: Health and innovation in Europe

*Lisbon, 6–8 November 2008*

**ABSTRACT SUPPLEMENT**

*Guest editors: Dineke Zeegers Paget, Constantino Sakelarides, Ilmo Keskimäki*

#### CONTENTS

1. Introduction
2. Conference programme
3. Plenary presentations
4. Oral presentations: abstracts
5. Poster presentations: abstracts
6. List of authors
